# Supplementary material for: A common polymorphism in SNCA is associated with accelerated motor decline in GBA-Parkinson’s disease
Source: PubMed Central journal article supplement (PMC7279193; doi:10.1136/jnnp-2019-322210), 2020-04-02
Supplement: jnnp-2019-322210supp001.pdf [file jnnp-2019-322210supp001.pdf]

## Supplementary Information

|                                                | <b>G/G</b>        | <b>G/A and A/A</b> | <b>P-value</b> |
|------------------------------------------------|-------------------|--------------------|----------------|
| <b>Number</b>                                  | 7                 | 13                 | -              |
| <b>Gender M:F</b>                              | 7:0               | 7:6                | 0.032          |
| <b>Age at diagnosis (SD)</b>                   | 72.4 years (10.3) | 75.5 years (9.3)   | 0.297          |
| <b>Years in education (SD)</b>                 | 9.7 years (1.1)   | 10.6 years (2.8)   | 0.428          |
| <b>Total UPDRS at baseline (SD)</b>            | 48.8 (15.7)       | 44.1 (14.0)        | 0.5            |
| <b>Motor UPDRS at baseline (SD)</b>            | 21.9 (13.0)       | 30.8 (9.9)         | 0.825          |
| <b>Hoehn &amp; Yahr stage at baseline (SD)</b> | 2.1 (0.6)         | 2.3 (0.6)          | 0.445          |
| <b>MMSE at baseline (SD)</b>                   | 27.6 (1.5)        | 27.2 (1.9)         | 0.624          |
| <b>BDI at baseline (SD)</b>                    | 7.9 (5.5)         | 7.4 (5.6)          | 0.858          |
| <b>Baseline levodopa equivalent dose (SD)</b>  | 188.6 mg (201.0)  | 185.4mg (213.3)    | 0.974          |

Supplementary Table 1 – Patient demographics.

| <b>Patient Number</b> | <b>GBA Variant</b> | <b>SNCA Genotype</b> |
|-----------------------|--------------------|----------------------|
| <b>1</b>              | E326K              | G/G                  |
| <b>2</b>              | T369M              | G/G                  |
| <b>3</b>              | N370S*             | G/G                  |
| <b>4</b>              | c. 762 - 18 T>A    | G/G                  |
| <b>5</b>              | L444P*             | G/G                  |
| <b>6</b>              | T369M              | G/G                  |
| <b>7</b>              | c. 762 - 18 T>A    | G/G                  |
| <b>8</b>              | T369M              | A/G                  |
| <b>9</b>              | c. 762 - 18 T>A    | A/G                  |
| <b>10</b>             | E326K              | A/G                  |
| <b>11</b>             | T369M              | A/G                  |
| <b>12</b>             | E326K              | A/G                  |
| <b>13</b>             | T369M              | A/G                  |
| <b>14</b>             | R257Q*             | A/G                  |
| <b>15</b>             | E326K              | A/A                  |
| <b>16</b>             | R48W*              | A/A                  |
| <b>17</b>             | L119L              | A/A                  |
| <b>18</b>             | c. 762 - 18 T>A    | A/A                  |
| <b>19</b>             | E326K              | A/A                  |
| <b>20</b>             | N462K*             | A/A                  |

**Supplementary Table 2 – GBA Variants and SNCA rs356219 carrier status in all subjects.**

Asterixes indicate variants previously associated with Gaucher disease.

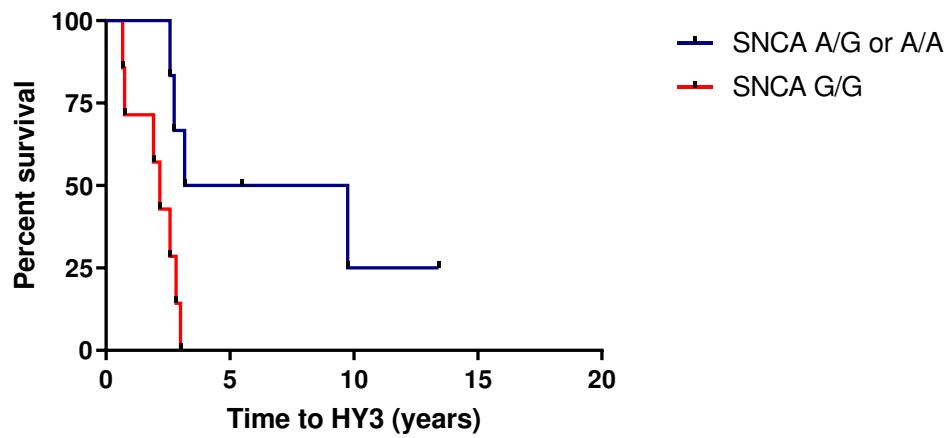

**Supplementary figure 1 – Survival analyses in *GBA1*-PD patients comparing those with high- and low-risk variants in the *SNCA* rs356219 polymorphism.** Kaplan-Meier curves for time to postural instability. To control for sex as a potential confounder, female patients were excluded, as all subjects in the *SNCA* G/G group were male. Abbreviations: HY3 = Hoehn and Yahr stage three.

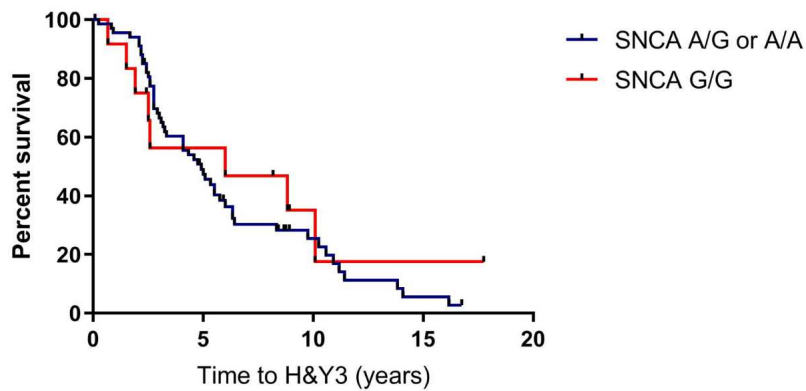

**Supplementary Figure 2 – Time to postural instability in PD patients without *GBA* variants, comparing those with high- and low-risk variants in the *SNCA* rs356219 polymorphism.** Kaplan-Meier curve for time to postural instability in patients, comparing those carrying the G/G *SNCA* rs356219 variant to A carriers at this locus. Abbreviations: H&Y3 = Hoehn and Yahr stage three.
